# Supplementary material
Source: Springer Nature journal article supplement (https://www.springermedizin.de/resource/supplementary/12985_2007_331_MOESM7_ESM.pdf/9607538)
Supplement: MOESM7 [file 9607538]

**A**

Ab titer against: ● M2e pep ○ HeLa-M2

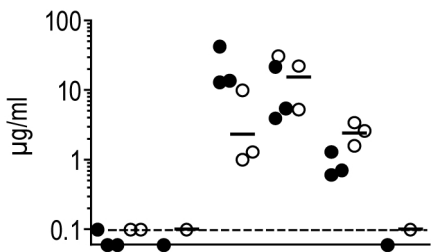**B**

Virus titer: Nose

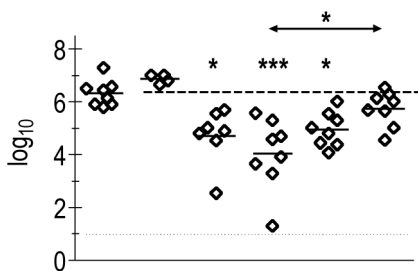**C**

Virus titer: Trachea

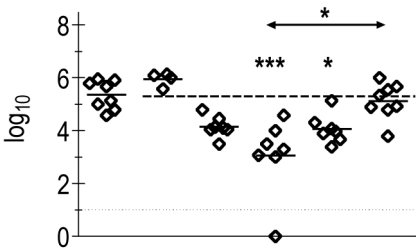**D**

Virus titer: Lung

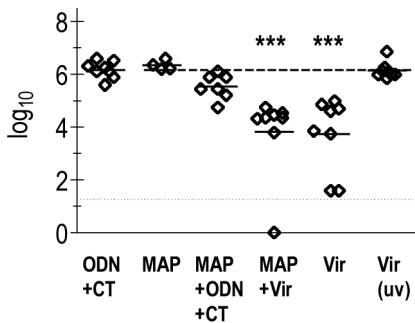ODN  
+CT

MAP

MAP  
+ODN  
+CTMAP  
+Vir

Vir

Vir  
(uv)
